# Supplementary material for: Skin in the Game: An Assay to Monitor Leukocyte Infiltration in Dermal Lesions of a Guinea Pig Model for Tick-Borne Rickettsiosis
Source: MDPI journal article supplement (doi:10.3390/pathogens11020119), 2022-01-20
Supplement: s1 [file s1]

| Laser                           | Parameter | Antigen   | Fluorochrome  |
|---------------------------------|-----------|-----------|---------------|
| Violet<br>405 nm<br>( mW)       | 445/45    | CD45      | DL405         |
| Blue<br>488 nm<br>( mW)         | 530/30    | CD8       | FITC          |
| Yellow-Green<br>561 nm<br>( mW) | 586/20    | CD4       | PE            |
|                                 | 615/20    | L1        | CF594         |
|                                 | 780/60    | CD1b3     | PE-Cy7        |
| Red<br>637 nm<br>( mW)          | 780/60    | Viability | Near Infrared |

**Figure S1. Panel Design.** The panel was designed to minimize cross-laser excitation, spillover, and residual donor fluorescence.

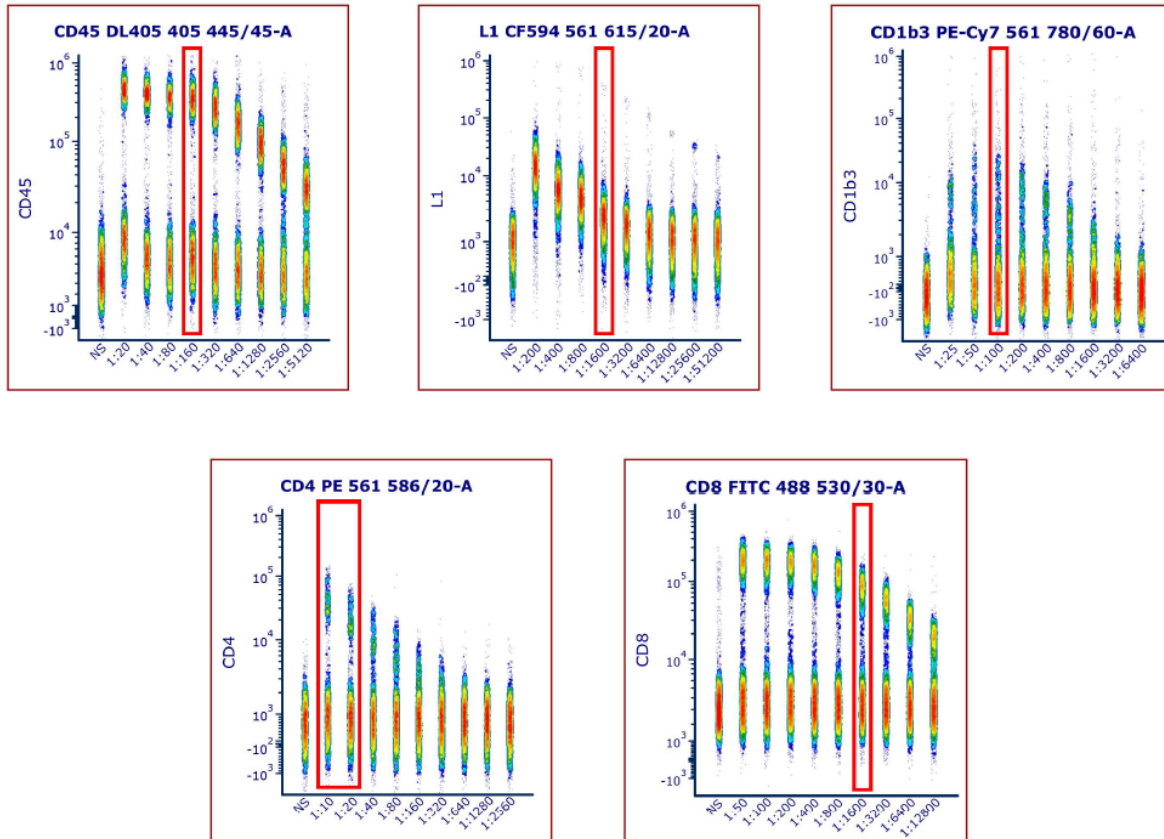

**Figure S2. Antibody titrations.** Titrations were performed using guinea pig peripheral blood. The protocol was identical to the fully stained tissue samples. The red boxes indicate the selected dilution based on population separation and data spread. On the CD4:PE plot, the chosen dilution was 1:15 due to excessive background noise at the 1:10 dilution. Images show concatenated individual FCS files.

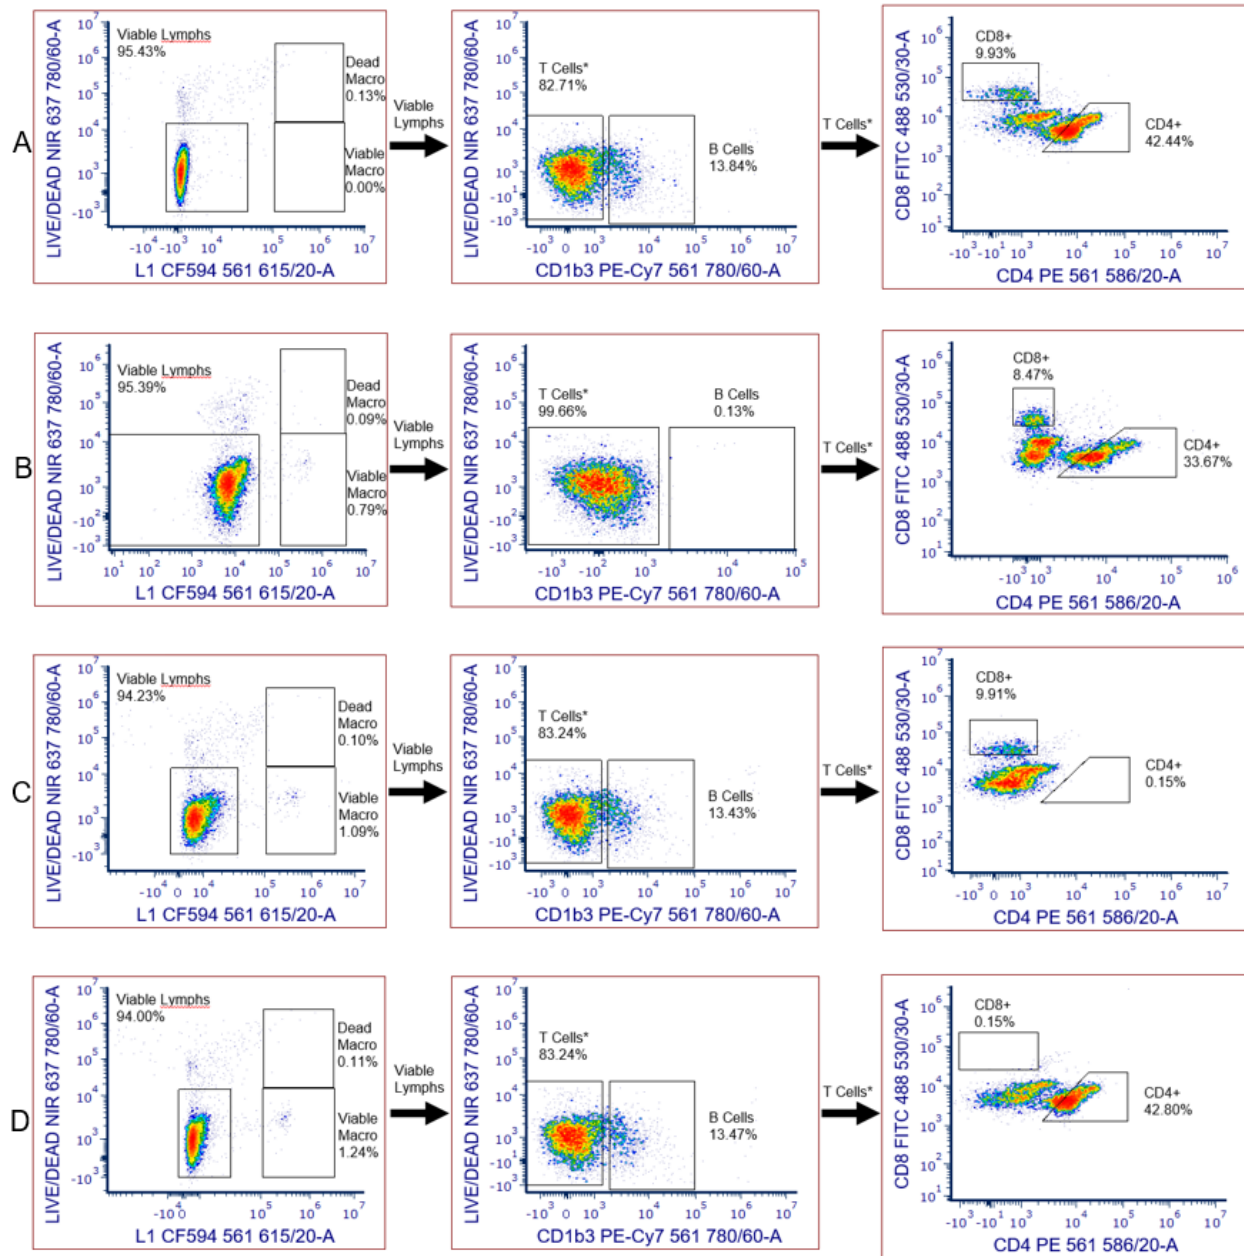

**Figure S3. Panels for gating and positivity controls.** In these samples, guinea pig peripheral blood was stained with every antibody except for one. All fluorescence minus one (FMO) controls were set to  $\leq 0.15\%$ . (A) FMO L1:CF594. (B) FMO CD1b3:PE-Cy7. (C) FMO CD4:PE. (D) FMO CD8:FITC. The T Cells\* population likely includes some Kurloff, dendritic, and natural killer cells in addition to T Cells.

**Table S1. Complete list of reagents and resources.**

| REAGENT <i>or</i> RESOURCE                                              | VENDOR                | CATALOG NUMBER |
|-------------------------------------------------------------------------|-----------------------|----------------|
| <i>Tissue Dissociation</i>                                              |                       |                |
| DNase I                                                                 | Invitrogen            | 18068015       |
| Fetal Bovine Serum – Hybridoma Qualified, Heat Inactivated              | Atlanta Biologicals   | S10650H        |
| Gentamicin Solution                                                     | Sigma-Aldrich         | G1397-10ML     |
| gentleMACS C Tubes                                                      | Miltenyi Biotec       | 130096334      |
| gentleMACS 70 µm SmartStrainers                                         | Miltenyi Biotec       | 130098462      |
| MACS Tissue Storage Solution                                            | Miltenyi Biotec       | 130100008      |
| Magnesium Chloride Solution                                             | Sigma-Aldrich         | 63069-100ML    |
| Multi Tissue Dissociation Kit 1                                         | Miltenyi Biotec       | 130110201      |
| RPMI 1640 Medium - No Phenol Red                                        | Gibco                 | 11835030       |
| <i>Antibodies and Dyes</i>                                              |                       |                |
| Lightning-Link PE-Cy7 Conjugate Kit                                     | Abcam                 | ab102903       |
| Lightning-Link Rapid DyLight 405 Conjugate Kit                          | Abcam                 | Ab201798       |
| LIVE/DEAD Fixable Near-IR Dead Cell Stain                               | Invitrogen            | L34976         |
| Mix-n-Stain CF594 Antibody Labeling Kit                                 | Biotium               | 92236          |
| Mouse anti-Guinea Pig CD1b3 (Clone MsGP9)                               | Bio-Rad               | MCA566GA       |
| Mouse anti-Guinea Pig CD4: PE (Clone CT7)                               | Bio-Rad               | MCA749PE       |
| Mouse anti-Guinea Pig CD45 (Clone IH-1)                                 | Bio-Rad               | MCA1130        |
| Mouse anti-Guinea Pig CD8: FITC (Clone CT6)                             | Bio-Rad               | MCA752F        |
| Mouse anti-Human (guinea pig-reactive) Macrophages (Clone MAC387)       | Bio-Rad               | MCA874G        |
| <i>Other Reagents</i>                                                   |                       |                |
| Bovine Serum Albumin                                                    | Sigma-Aldrich         | A3059-100G     |
| Cell Culture Water                                                      | Sigma-Aldrich         | W3500          |
| DMSO, Anhydrous                                                         | Invitrogen            | D12345         |
| Guinea Pig Serum                                                        | Sigma-Aldrich         | G9774-5ML      |
| Intracellular Staining Permeabilization Wash Buffer (10X)               | BioLegend             | 421002         |
| Millipore Purified Water (0.1 µm filtered)                              | Millipore-Sigma       |                |
| NovoCyte QC Particles                                                   | Acea Biosciences      | 8000004        |
| OneComp eBeads Compensation Beads                                       | Invitrogen            | 01111142       |
| PBS (Ca <sup>2+</sup> and Mg <sup>2+</sup> free), pH 7.4                | Gibco                 | 10010049       |
| Pierce 16% Formaldehyde (w/v), Methanol-free                            | Thermo-Fisher         | 28906          |
| Propidium Iodide Staining Solution                                      | Invitrogen            | 00699050       |
| Simply Cellular anti-Mouse Beads for Violet Laser                       | Bangs Laboratories    | 451            |
| True-Stain Monocyte Blocker                                             | BioLegend             | 426102         |
| Trypan Blue Stain (0.4%)                                                | Invitrogen            | T10282         |
| Viability Dye Compensation Standard (8 µm)                              | Bangs Laboratories    | 451            |
| <i>Materials</i>                                                        |                       |                |
| Acrocap 0.1 µm Filters                                                  | Pall Corporation      | 4481           |
| Acrodisc 0.2 µm Syringe Filters                                         | Pall Corporation      | 4652           |
| Countess Cell Counter Chamber Slides                                    | Invitrogen            | C10228         |
| Falcon Round-Bottom Polypropylene Tubes (12x75 mm)                      | Corning Life Sciences | 352063         |
| Falcon Round-Bottom Polystyrene Tubes (12x75 mm)                        | Corning Life Sciences | 352032         |
| Falcon Round-Bottom Polystyrene Tubes (12x75 mm) with Cell Strainer Cap | Corning Life Sciences | 352235         |
| pH Paper                                                                | Whatman               | 2629990        |
| Sterile Disposable Biopsy Punch                                         | Integra               | 3334           |

|                                                |                   |                                                                                                                                                                                                                     |
|------------------------------------------------|-------------------|---------------------------------------------------------------------------------------------------------------------------------------------------------------------------------------------------------------------|
| 30 mL Syringe with Luer-Lok Tip                | BD Biosciences    | 309650                                                                                                                                                                                                              |
| <i>Instruments and Software</i>                |                   |                                                                                                                                                                                                                     |
| Countess II FL Automated Cell Counter          | Life Technologies | <a href="https://www.thermofisher.com/order/catalog/product/A27974?us&amp;en%22%20\l%20%22/A27974?us&amp;en">https://www.thermofisher.com/order/catalog/product/A27974?us&amp;en%22%20\l%20%22/A27974?us&amp;en</a> |
| EVOS LED Light Cube (RFP)                      | Invitrogen        | AMEP4952                                                                                                                                                                                                            |
| FCS Express (version 7.06.0015)                | De Novo Software  | <a href="https://denovosoftware.com/">https://denovosoftware.com/</a>                                                                                                                                               |
| gentleMACS Octo Dissociator with Heaters       | Miltenyi Biotec   | <a href="https://www.miltenyibiotec.com/">https://www.miltenyibiotec.com/</a>                                                                                                                                       |
| NovoCyte Quanteon (4025-default configuration) | Agilent           | <a href="https://www.agilent.com/">https://www.agilent.com/</a>                                                                                                                                                     |
| NovoExpress (version 1.5.0.2001)               | Agilent           | <a href="https://www.agilent.com/">https://www.agilent.com/</a>                                                                                                                                                     |
